# Supplementary material
Source: PubMed Central journal article supplement (PMC8377020)

**A**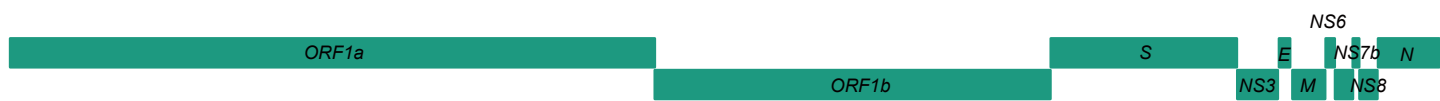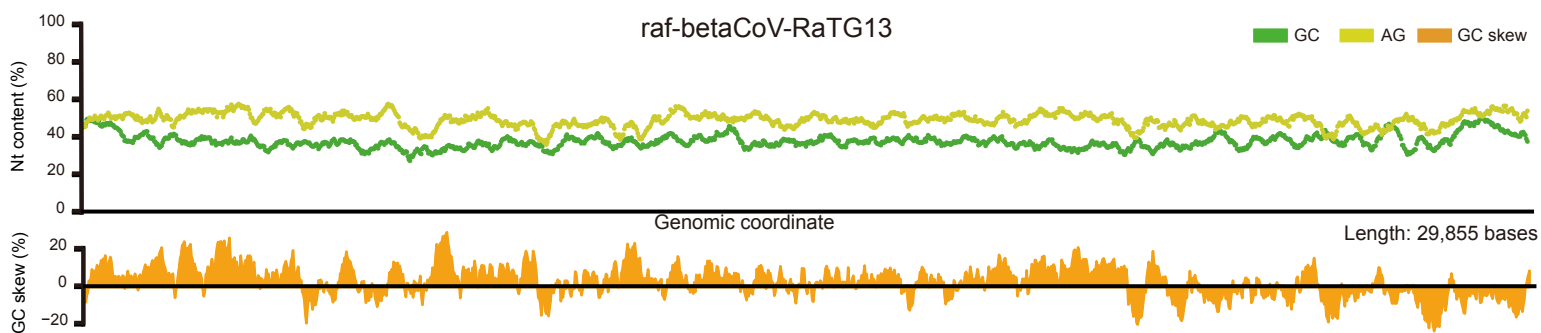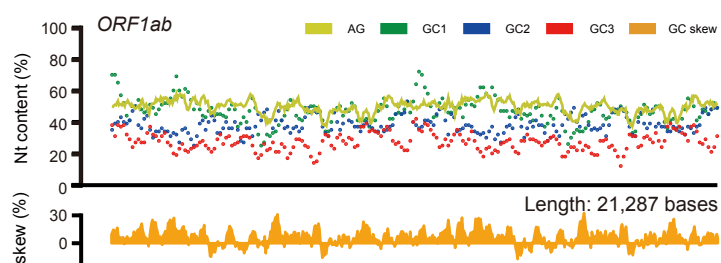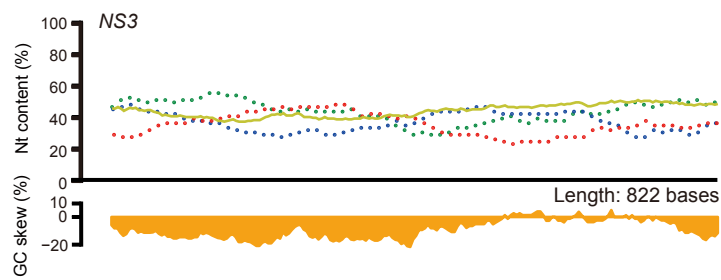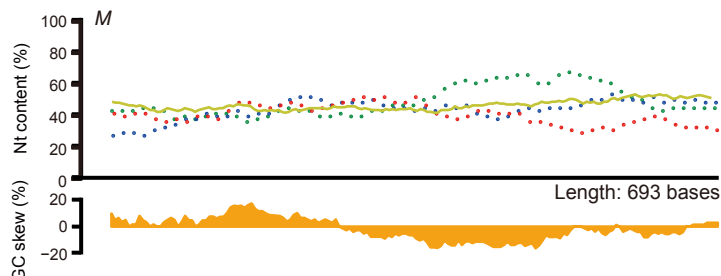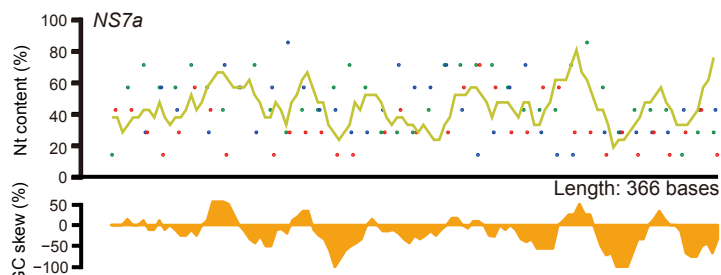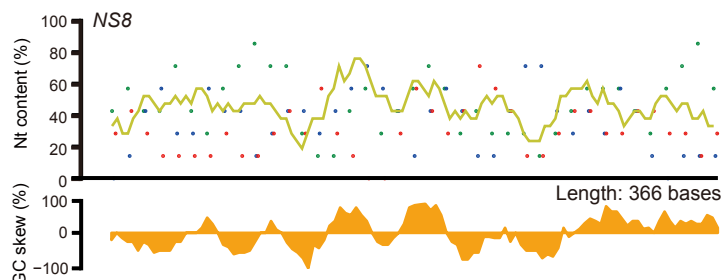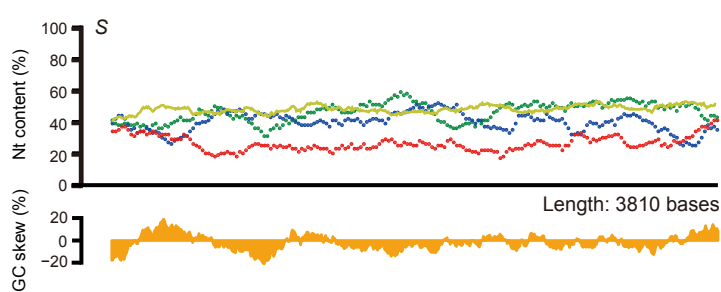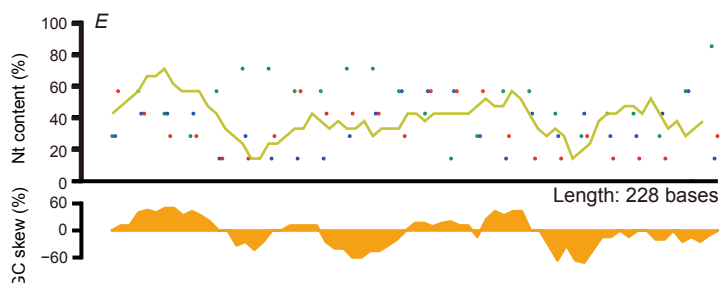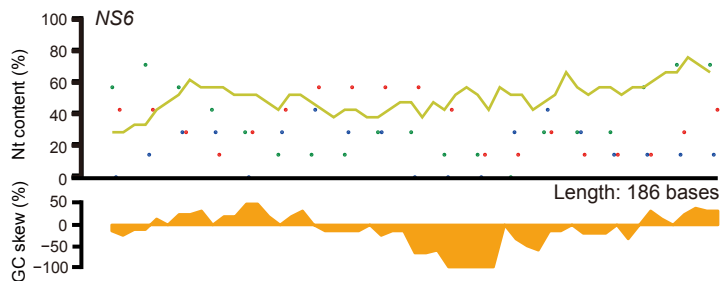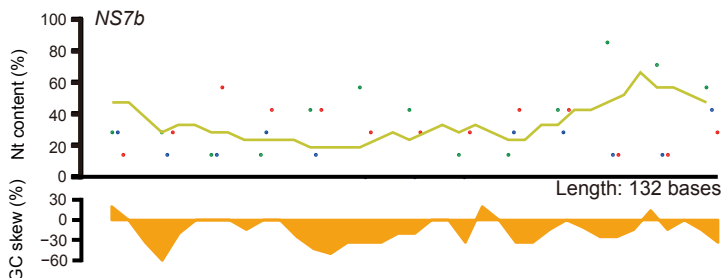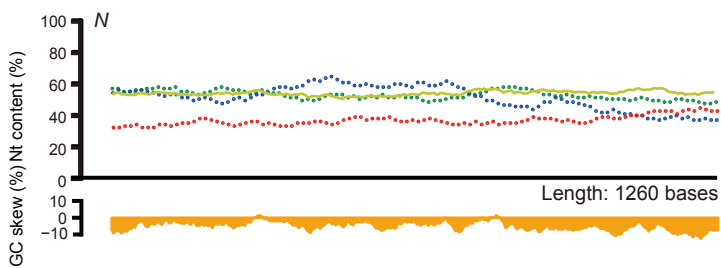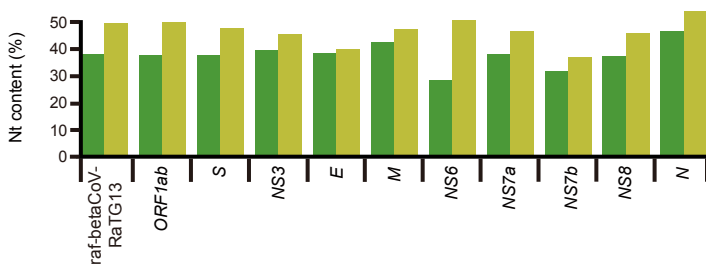

**B**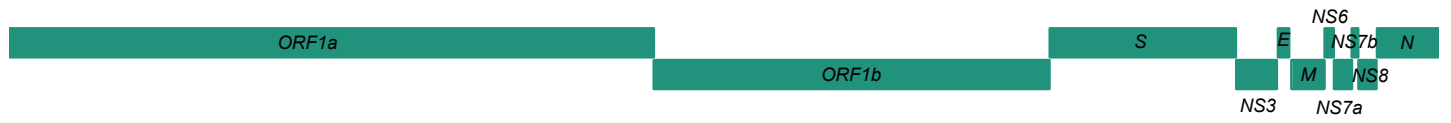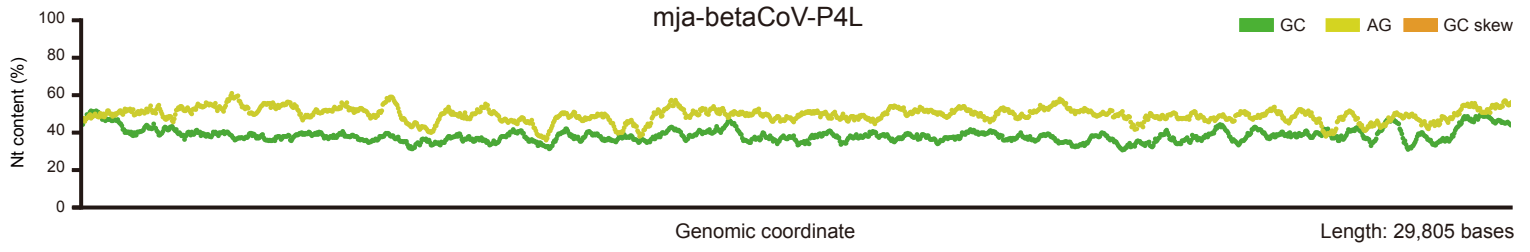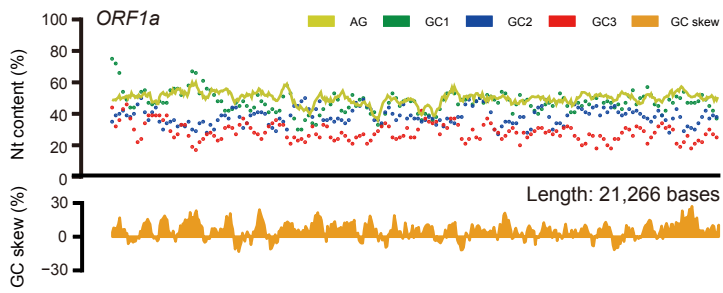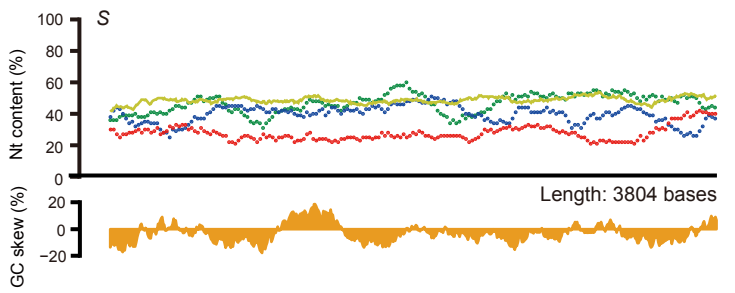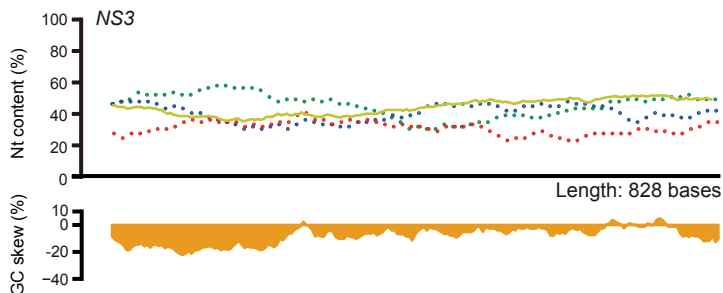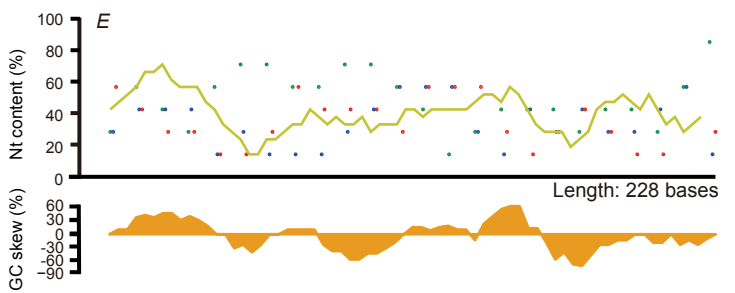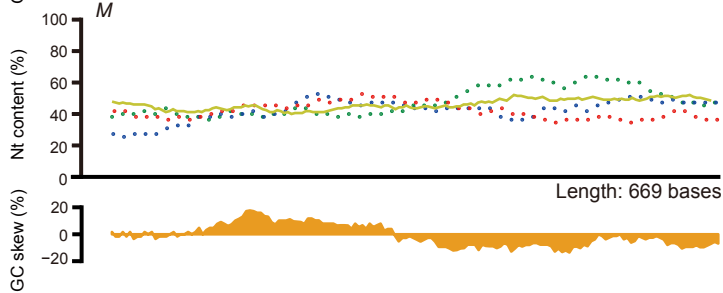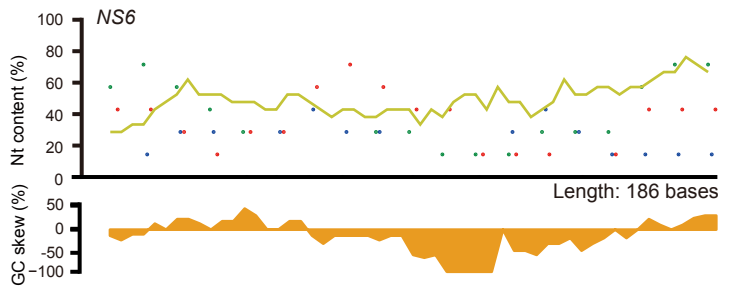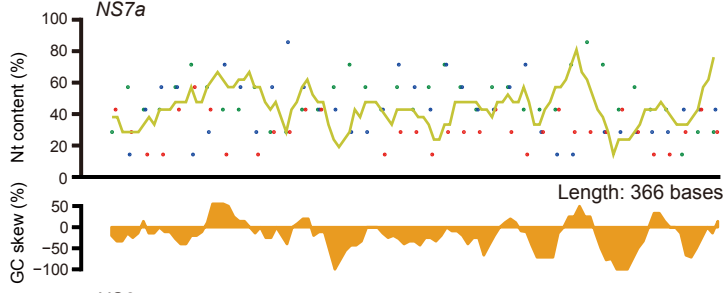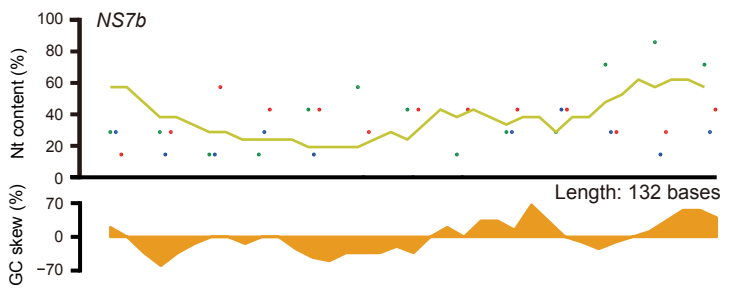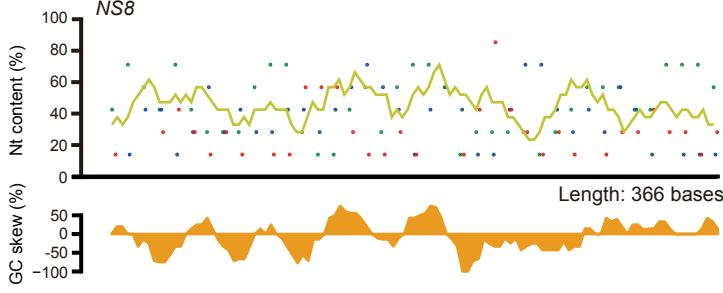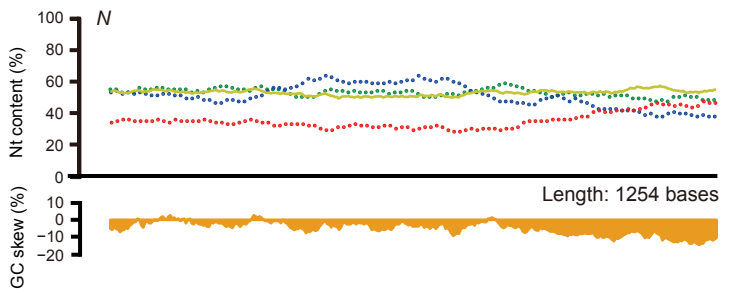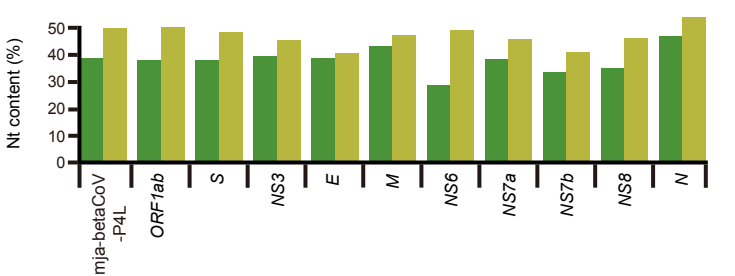

C

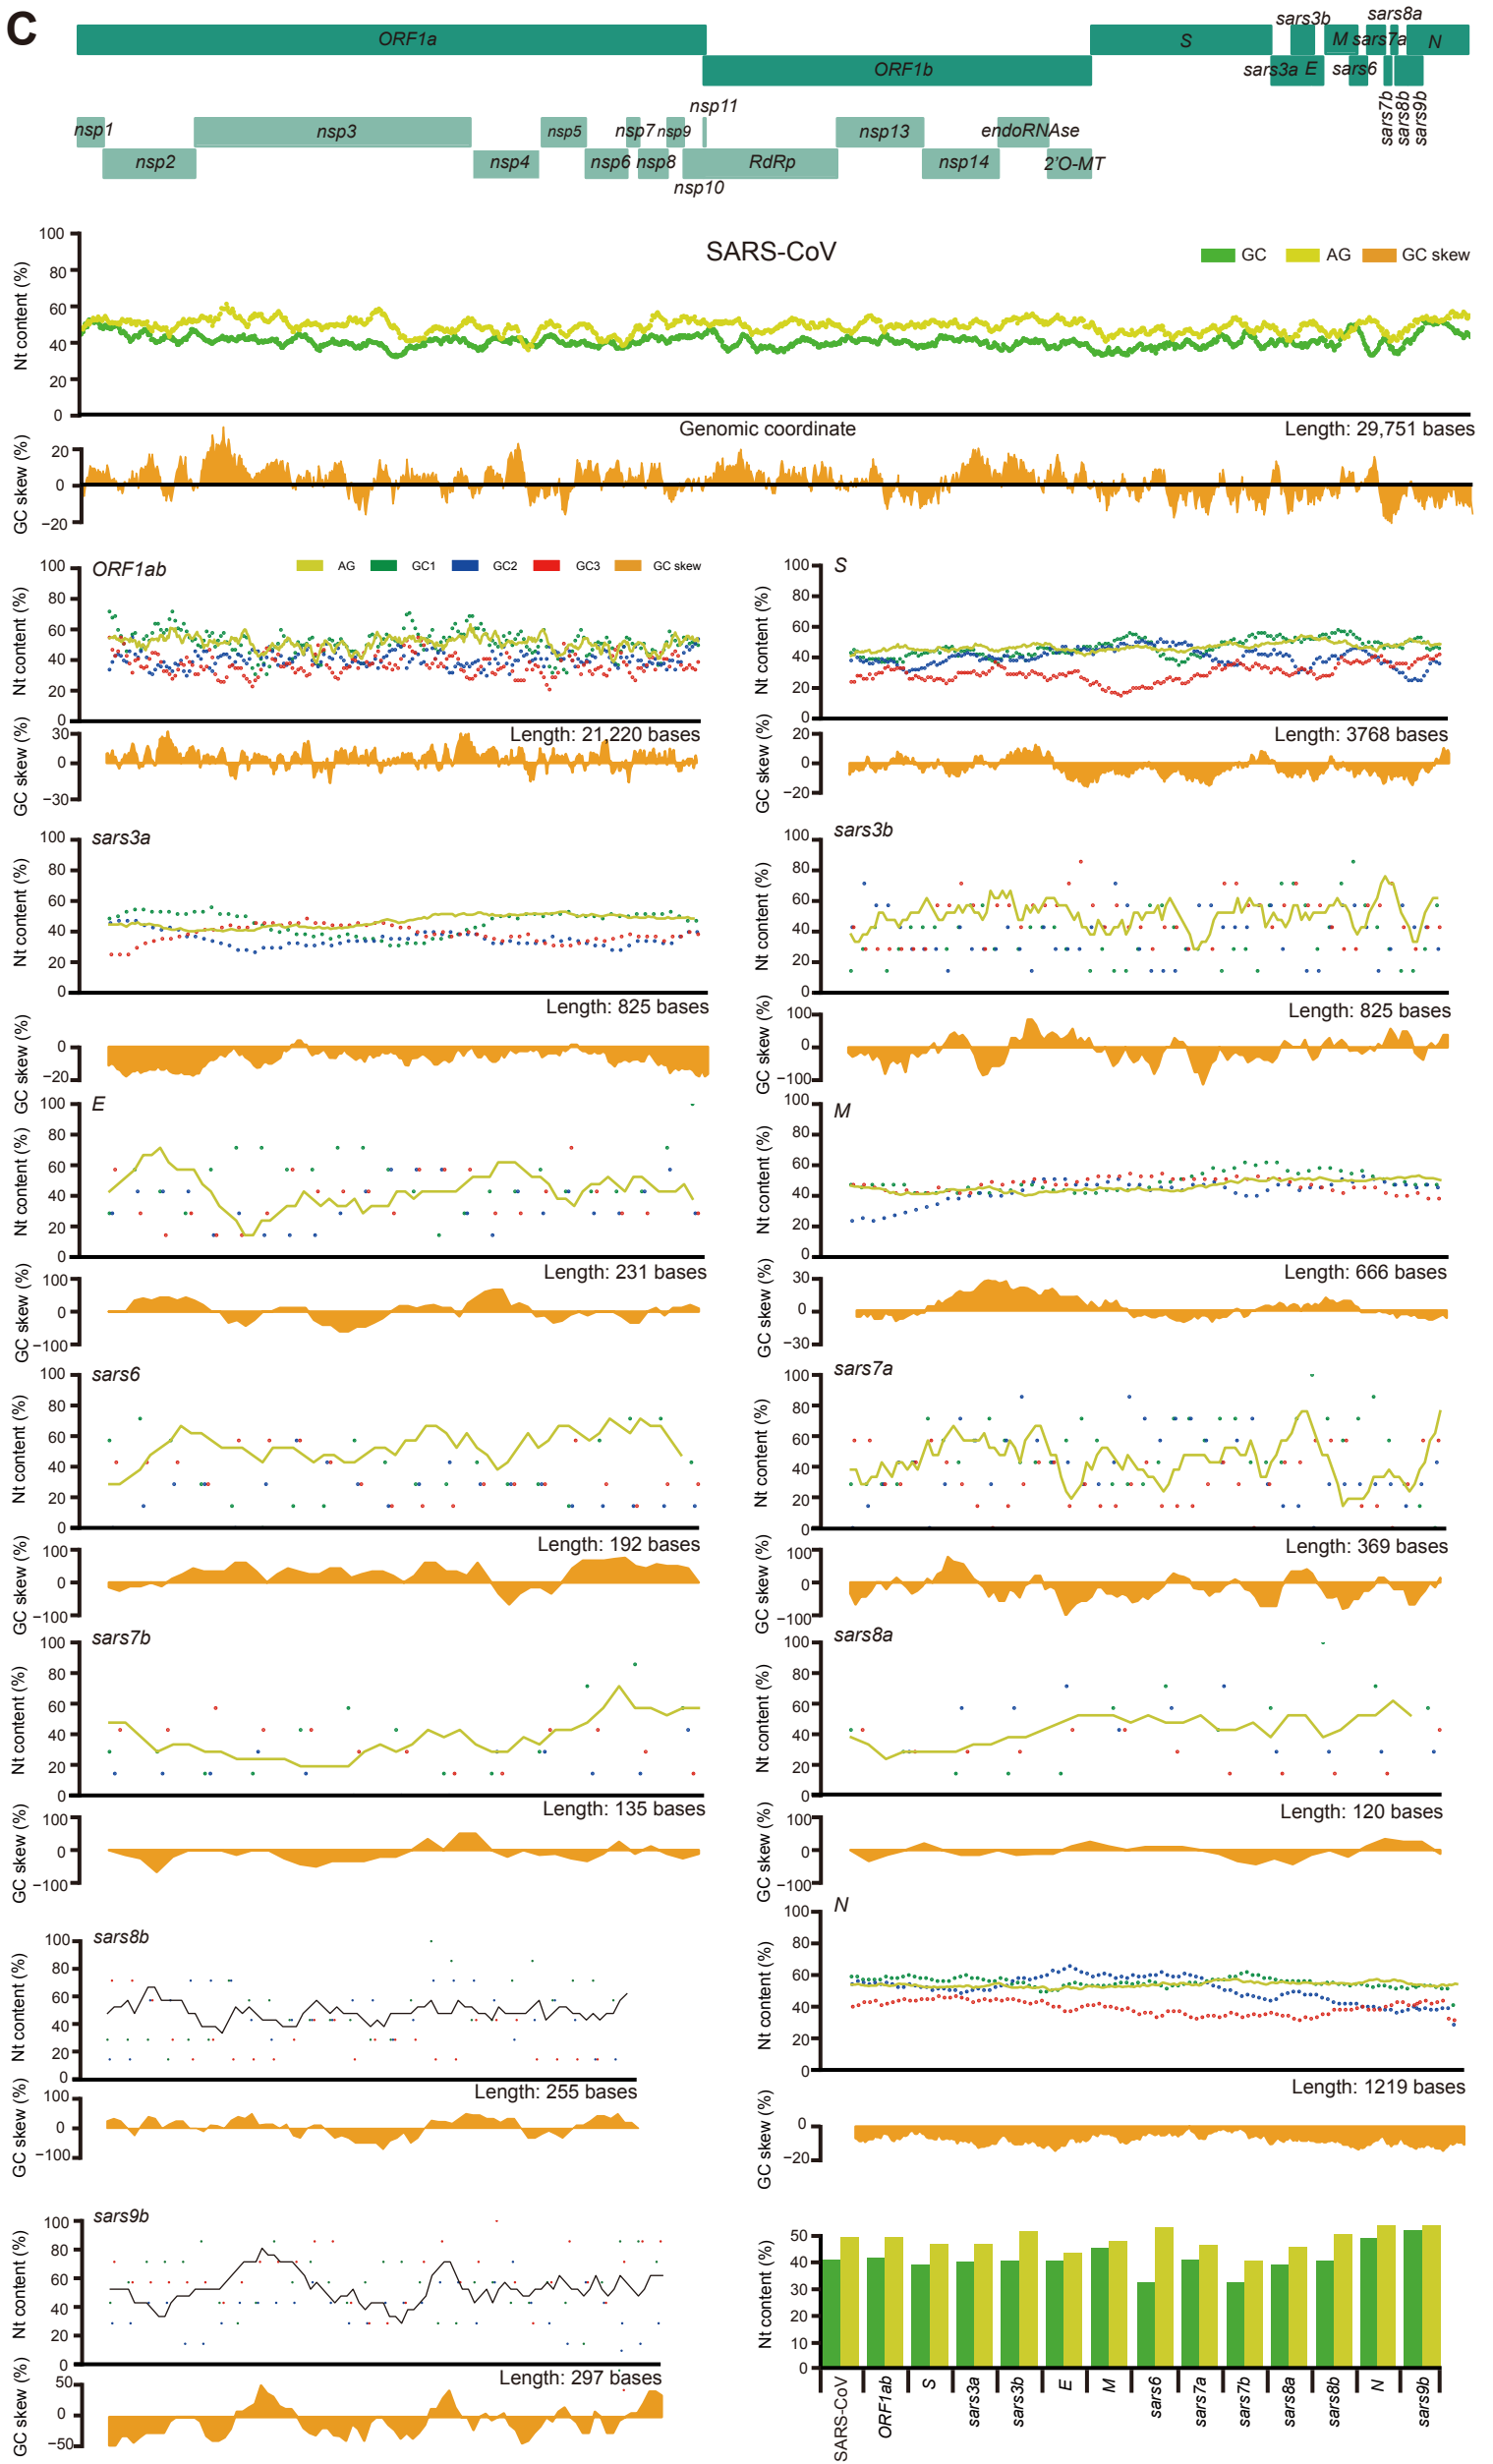

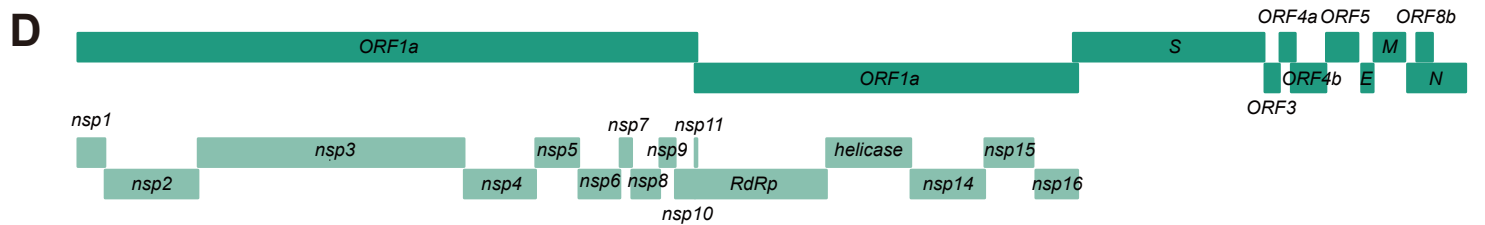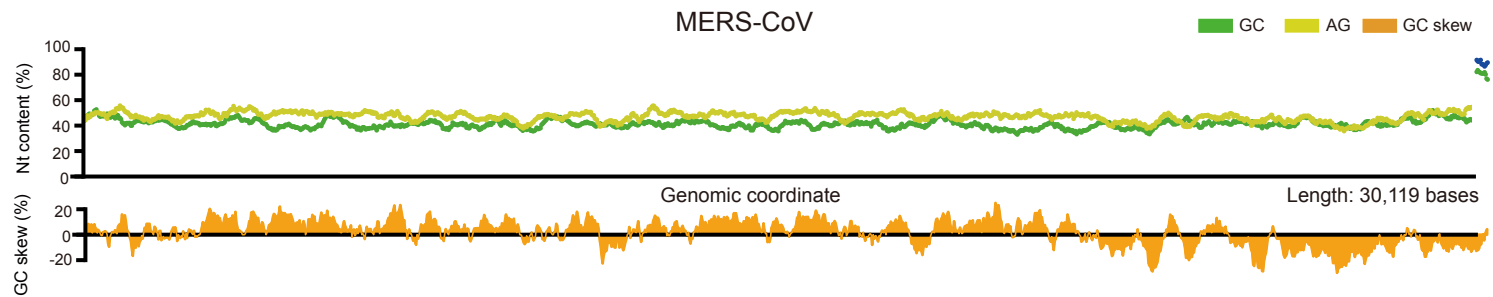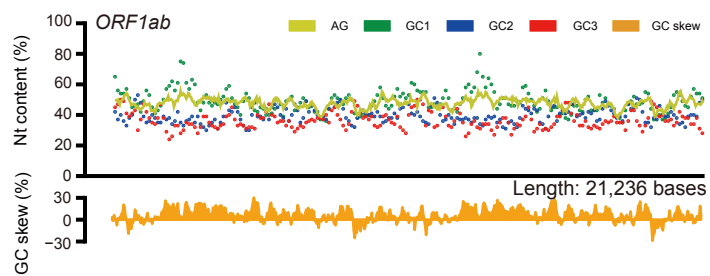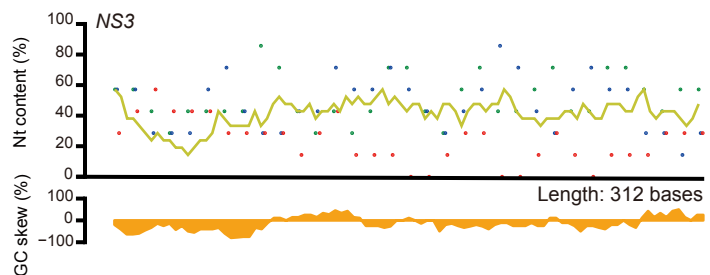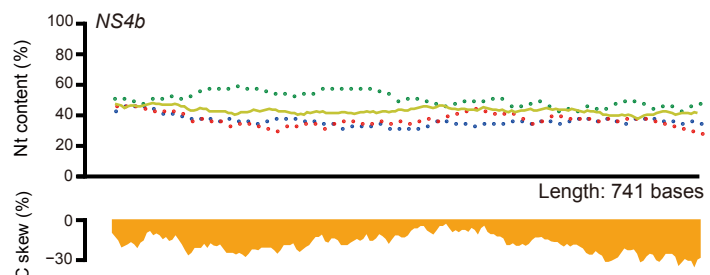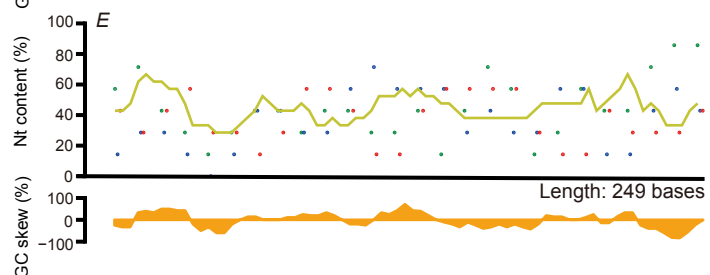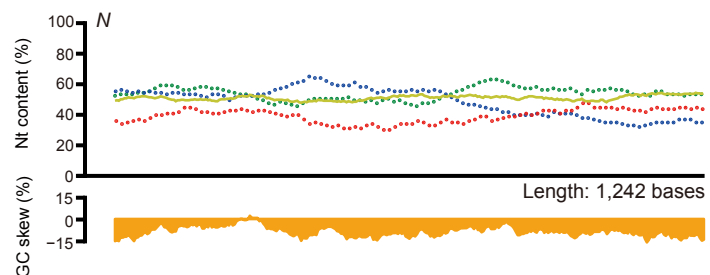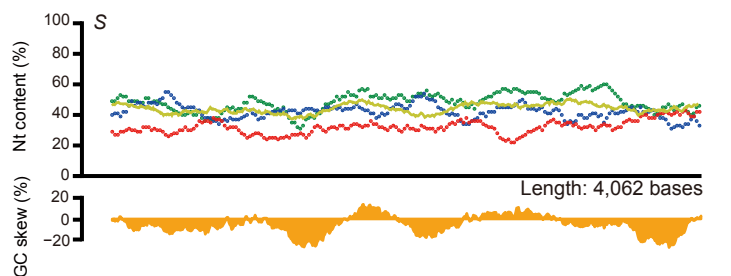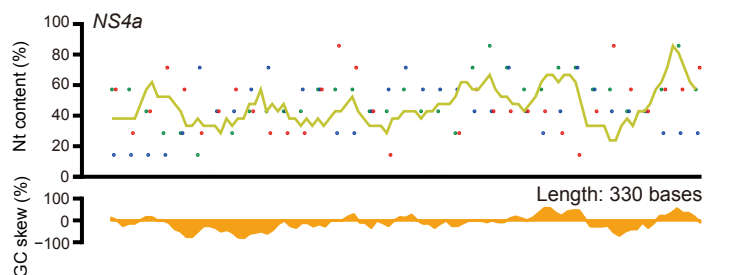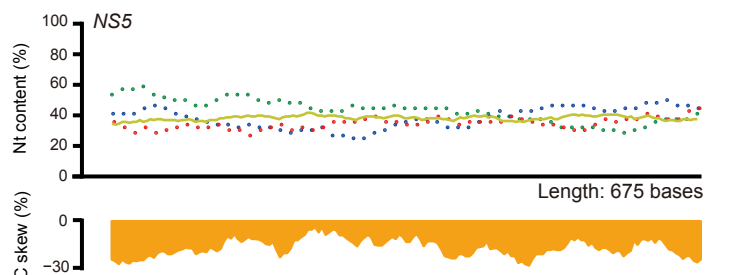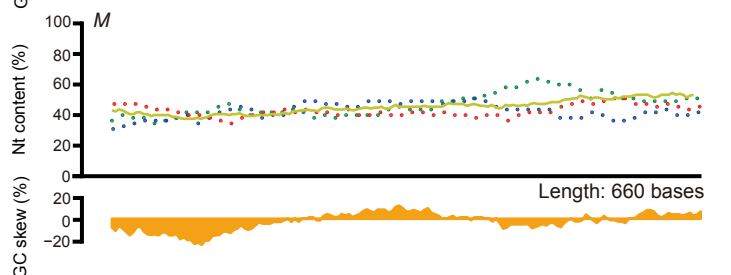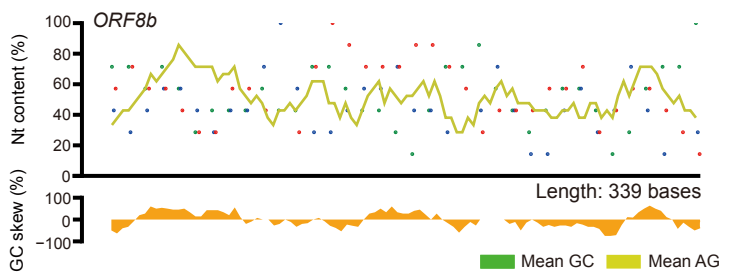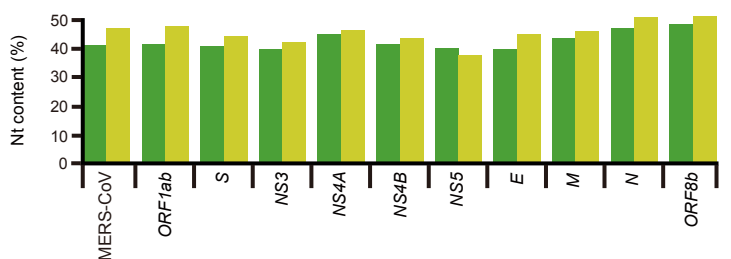

Supplement: mmc1.pdf [file mmc1.pdf]

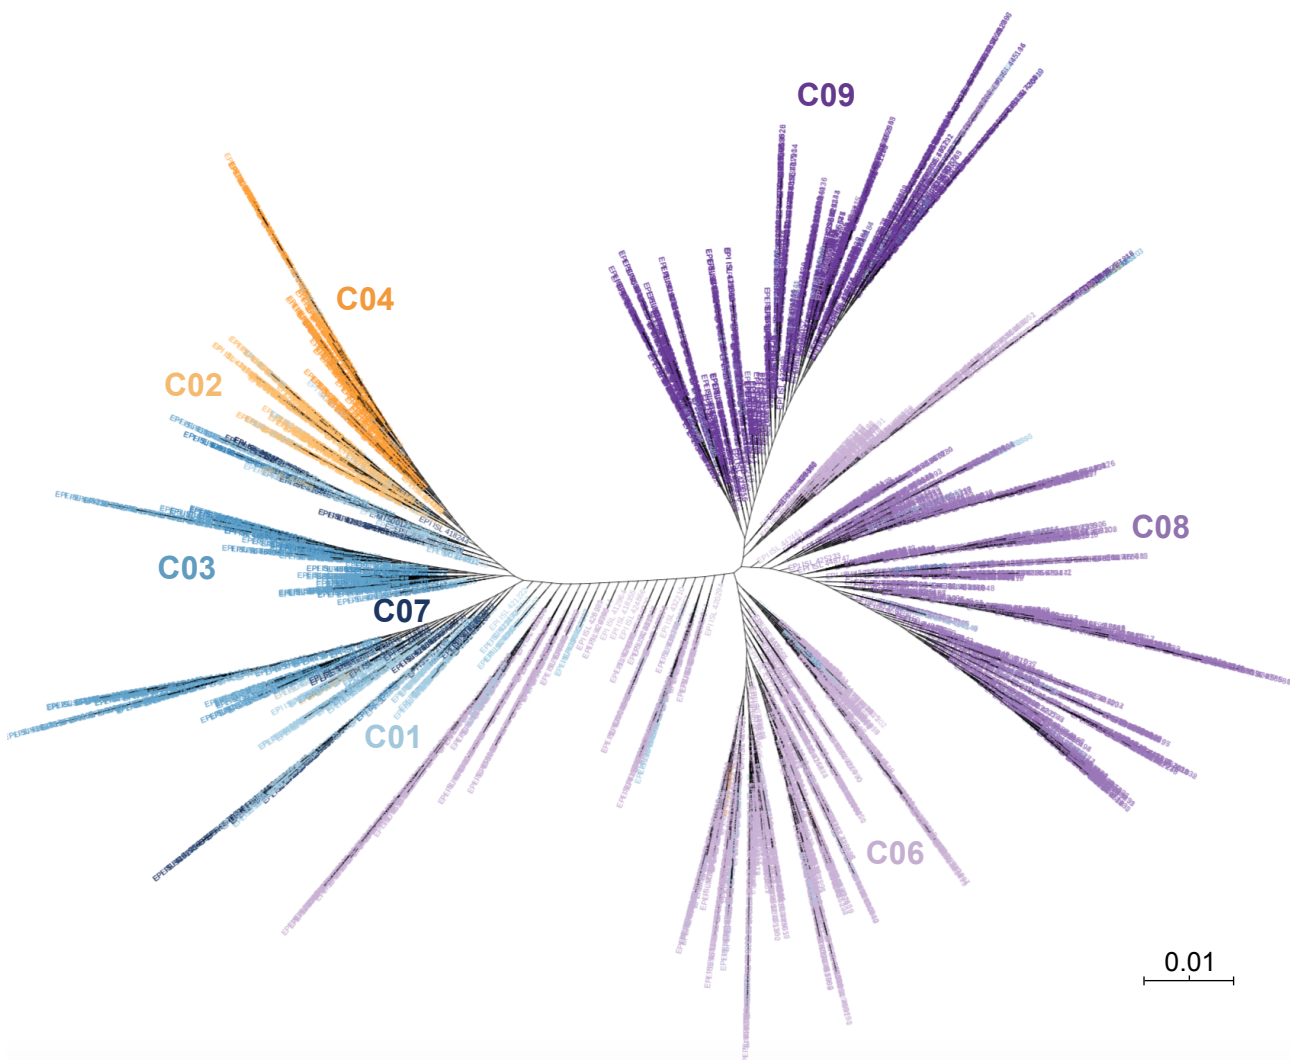

Supplement: mmc4.pdf [file mmc4.pdf]

# G+C content descending

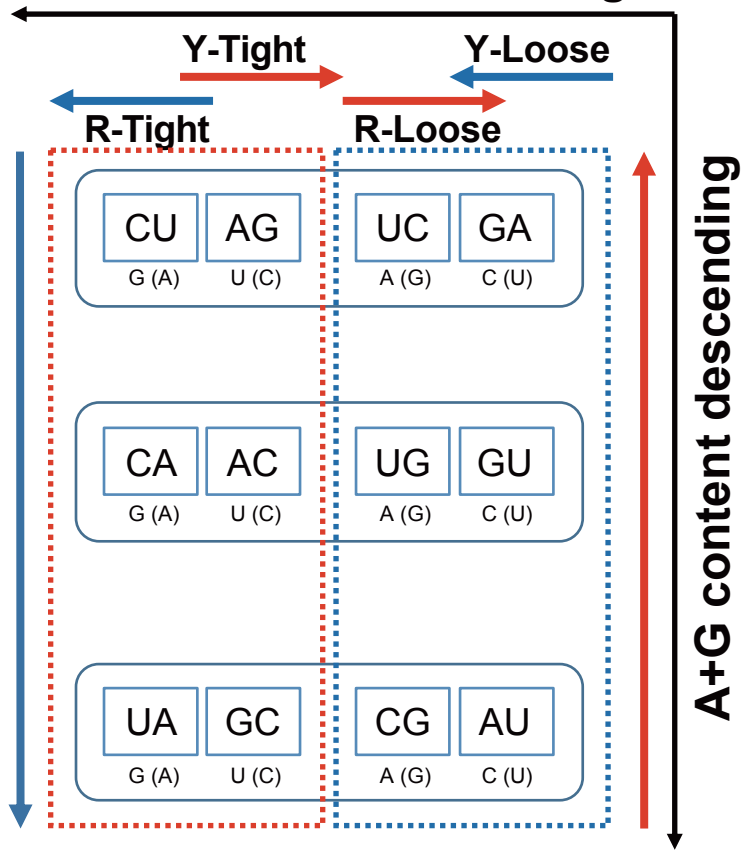

Supplement: mmc5.pdf [file mmc5.pdf]

**A C01**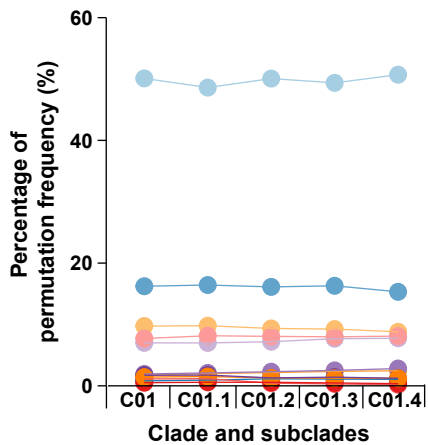**B C04**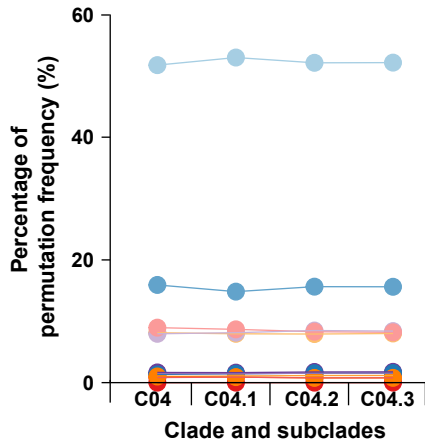**C C06**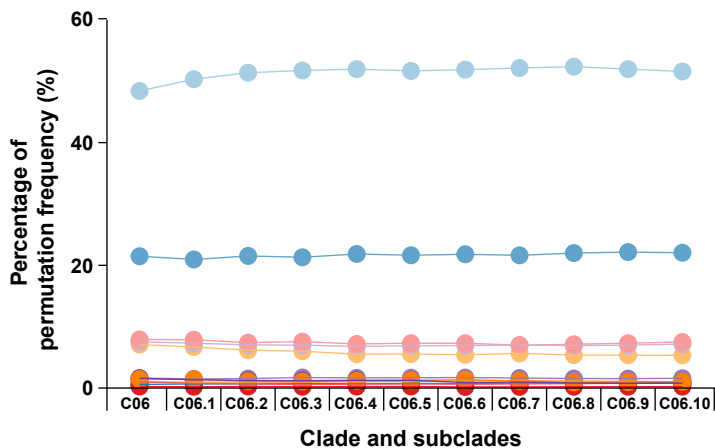**D C07**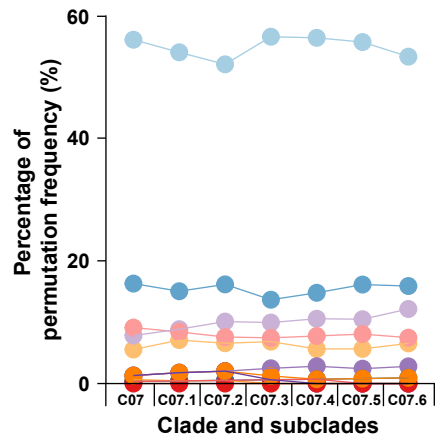**E C08**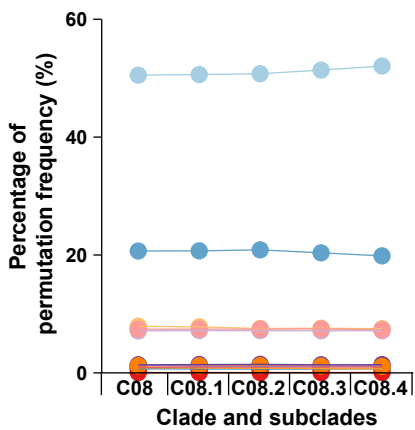**F C09**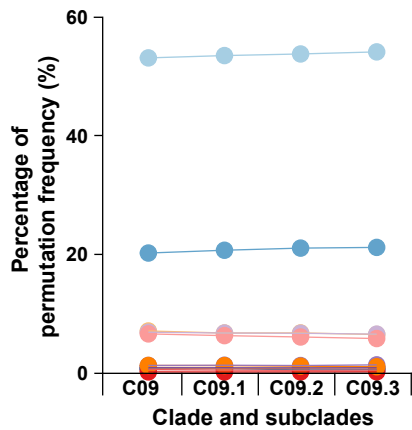

Permutation

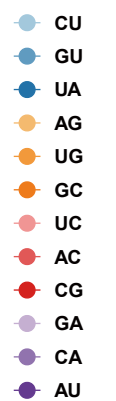

Supplement: mmc6.pdf [file mmc6.pdf]
